# Supplementary material
Source: Springer Nature journal article supplement (https://mijn.bsl.nl/resource/supplementary/13047_2009_96_MOESM1_ESM.pdf/7109684)
Supplement: MOESM1 [file 7109684]

Prospective participants screened for AI and NNHt

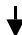

**Clinical measurements**  
AI and NNHt measurements taken from Scott and colleagues [7] – based on 50 young adults

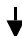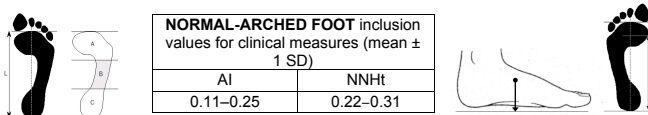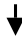

AI and / or NNHt within normal-arch range for one foot?

YES

NO

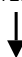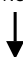

Participant referred for A-P and lateral radiographs

Participant not recruited to study

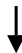

**Radiographic measurements**  
CIA and TSMA mean  $\pm$  1 SD taken from Thomas et al [10] – based on 100 healthy adults

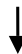

| NORMAL-ARCHED FOOT inclusion values for radiographic measures (mean $\pm$ 1 SD)<br>(refer to table 1 for actual normal-arched foot values) |             |       |         |       |         |            |            |
|--------------------------------------------------------------------------------------------------------------------------------------------|-------------|-------|---------|-------|---------|------------|------------|
| CIA                                                                                                                                        |             | C1MA  |         | TNCA  |         | T2MA       |            |
| Males                                                                                                                                      | Females     | Males | Females | Males | Females | Males      | Females    |
| 13.2°–26.2°                                                                                                                                | 13.8°–25.6° | n/a   | n/a     | n/a   | n/a     | 9.6°–24.2° | 8.1°–23.1° |

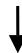

Both lateral and A-P measurements within normal-arch range for at least one foot?

YES

NO

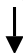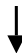

Participant recruited to study – labelled  
**NORMAL-ARCHED FEET** (n=32)  
i.e. 62% successful

Participant not recruited to study – labelled  
**'NON-QUALIFIERS'** (n=20)  
i.e. 38% unsuccessful
